# Supplementary material
Source: PubMed Central journal article supplement (PMC3578382)

### Table S1: Patient History for PBT lines.

Patient history for other PBT lines characterized in this manuscript is described in (Brown et al. 2009).

| <b>Tumor ID</b> | <b>Patient ID</b> | <b>Age</b> | <b>Gender</b> | <b>Diagnosis</b>                                      | <b>Prior Teatment</b>      |
|-----------------|-------------------|------------|---------------|-------------------------------------------------------|----------------------------|
| PBT015          | UPN033            | 57         | M             | Glioblastoma Multiforme grade IV                      | Radiotherapy, temozolomide |
| PBT030          | De-Identified     | 59         | M             | Glioblastoma Multiforme grade IV; right temperal lobe | Newly diagnosed            |

**Table S2: Primary Antibody Details**

| Antibody                                                 | Clone  | Source: Catalogue Number               | Usage                 |
|----------------------------------------------------------|--------|----------------------------------------|-----------------------|
| Goat polyclonal anti-IL13R $\alpha$ 2                    | N/A    | R&D Systems: AF146                     | FC; Western:<br>P-IHC |
| Mouse monoclonal anti-IL13R $\alpha$ 2                   | B-D13  | Diaclone/Cell Sciences Inc: 852.120.00 | FC                    |
| Chicken polyclonal anti-IL13R $\alpha$ 2                 | N/A    | Sigma-Aldrich: GW22455A                | Western               |
| PE-conjugated mouse anti-CD133/1                         | AC133  | Miltenyi Biotec Inc.: 130-080-801      | FC                    |
| PE-conjugated mouse anti-CD133/2                         | 293C3  | Miltenyi Biotec Inc.: 130-090-853      | FC                    |
| Mouse monoclonal anti-CD133                              | W6B3C1 | Miltenyi Biotec Inc.: 130-092-395      | Western               |
| Goat polyclonal anti-Olig2                               | N/A    | R&D Systems: AF2418                    | Western, P-<br>IHC    |
| Rabbit polyclonal anti- $\beta$ -Actin                   | N/A    | Rockland Immunochemicals: 600-401-866  | Western               |
| Mouse monoclonal anti- $\beta$ -III Tubulin              | TU-20  | Millipore: CBL412                      | Western; IF           |
| Rabbit polyclonal anti-GFAP                              | N/A    | Sigma-Aldrich: G9269                   | Western; IF           |
| Rabbit Polyclonal anti-GFAP                              | N/A    | Dako Corp: Z0334                       | P-IHC                 |
| Rabbit polyclonal anti-SOX2                              | N/A    | Abcam, Inc.: ab15830                   | IF                    |
| Mouse monoclonal anti-SOX2                               | 245610 | R&D Systems: MAB2018                   | P-IHC                 |
| Mouse monoclonal anti-Nestin                             | 10C2   | Millipore: MAB5326                     | IF; P-IHC             |
| FITC-conjugated mouse monoclonal anti-TCR $\alpha/\beta$ | WT31   | Becton Dickenson: 347773               | FC                    |
| FITC-conjugated mouse monoclonal anti-CD3                | SK7    | Becton Dickenson: 349201               | FC                    |
| PE-conjugated mouse monoclonal anti-CD8                  | SK1    | Becton Dickenson: 340046               | FC                    |
| Anti-CD3zeta                                             | 8D3    | BD Biosciences: 51-6527GR              | Western               |

N/A, Not applicable

FC, Flow cytometry

IF, Immunofluorescence

P-IHC, Immunohistochemistry of paraffin embedded tissue

**Table S3: Real-time PCR Primer Details.**

| <b>Primer target</b>          | <b>Primer Sequences</b>                                      | <b>Amplification Efficiency*</b> |
|-------------------------------|--------------------------------------------------------------|----------------------------------|
| IL13R $\alpha$ 2<br>exons 1-2 | 5'TGAAGTCGCCATAACCTG<br>5'AAGCATCCGATAGCCAAG                 | 85 $\pm$ 6.5%                    |
| IL13R $\alpha$ 2<br>exons 6-7 | 5'ATGCAGATTTCCCTATTTGGAGG<br>5'TGGCGGCAAAGGTTTAACTAT         | 80% $\pm$ 4.4%                   |
| $\beta$ -actin                | 5'CCGCCGATCCACACGGAGTACTTG<br>5'CAGGATGCAGAAGGAGATCACTGCCCTG | 84% $\pm$ 2.4%                   |

\*, PCR products were evaluated by melting curve analysis and gel electrophoresis to verify amplification of a single product of the correct size.

**Table S4: *In Vitro* Self-Renewal and *in Vivo* Tumorigenicity.**

| <b>TS Line</b> | <b>Number of heterotopic passages</b> | <b>Secondary TS Formation</b> | <b>Min. # cells for tumor initiation (2-4 mo)</b> | <b>Time to Morbidity (<math>10^5</math> cells)</b> | <b>Histological Features</b>              |
|----------------|---------------------------------------|-------------------------------|---------------------------------------------------|----------------------------------------------------|-------------------------------------------|
| UPN033-PBT015  | 0                                     | $4.9 \pm 0.6\%$               | $10^5$ §                                          | ND                                                 | Diffuse cells, no tumor mass              |
| PBT030         | 0                                     | $11.8 \pm 0.4\%$              | $10^5$ §                                          | $80 \pm 9$<br>(n = 12)                             | Tumor mass with highly infiltrative edges |
| PBT030-2       | 2                                     | $5.2 \pm 1.4\%$               | $10^5$ §                                          | $76 \pm 2$<br>(n = 4)                              | Tumor mass with highly infiltrative edges |

§, Lower numbers of cells were not tested.

ND, not done.

Characterization of other PBT lines is reported in (Brown et al. 2009).

**Figure S1: Differential recognition of IL13R $\alpha$ 2 by commercial antibodies.**

(A) Flow cytometry analysis of IL13R $\alpha$ 2<sup>pos</sup> U251T and U87, and IL13R $\alpha$ 2<sup>neg</sup> T98 glioma cell lines using the mouse monoclonal (Cell Sciences, B-D13) and goat polyclonal (R&D Systems, AF146) antibodies. Daudi lymphoma serves as an IL13R $\alpha$ 2<sup>neg</sup> control cell line. Percent positive cells are indicated in each histogram. Note that monoclonal anti-IL13R $\alpha$ 2 B-D13 antibody (Cell Sciences) did not recognize IL13R $\alpha$ 2 protein by flow cytometry on the well documented IL13R $\alpha$ 2<sup>pos</sup> U251T or U87 cell lines, which express high levels of IL13R $\alpha$ 2 mRNA (Fig. 2), and are potently killed by the IL13R $\alpha$ 2-specific IL13-zetakine-engineered CTL (Fig. 4). Moreover, this antibody detects an antigen expressed by the IL13R $\alpha$ 2<sup>neg</sup> T98 cell line, which express very low levels of IL13R $\alpha$ 2 mRNA (Fig. 2), and are not recognized and killed by the IL13R $\alpha$ 2-specific IL13-zetakine-engineered CTL (Fig. 4). (B) Western analysis of established cell lines U251T, U87, T98 and Daudi using chicken polyclonal anti-IL13R $\alpha$ 2 antibody (Sigma, GW22455A). Note that IL13R $\alpha$ 2 expression is detected for IL13R $\alpha$ 2<sup>neg</sup> T98 glioma cell line (Fig. 2). Detection of a similar Western reactive protein was detected for the IL13R $\alpha$ 2<sup>neg</sup> primary glioma lines PBT003, PBT008 and PBT009 (data not shown).

**A**

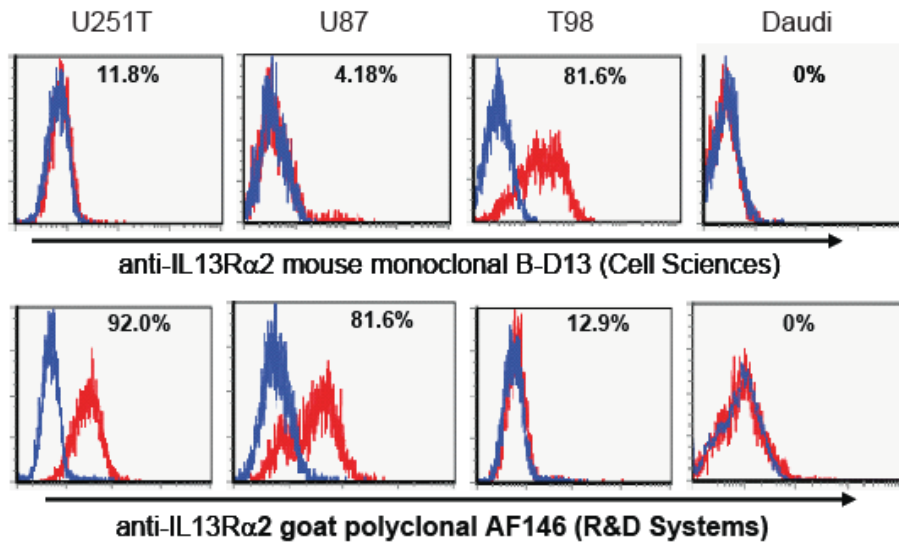

**B**

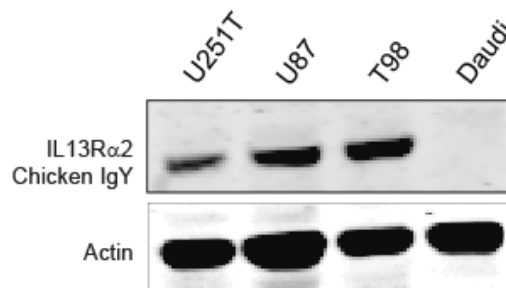

**Figure S2: Cell surface phenotype and chimeric antigen receptor (CAR) expression of ex vivo engineered and expanded effector cytolytic T lymphocytes (CTLs).** (A) CTLs were analyzed by flow cytometry using FITC or PE-conjugated antibody against  $\alpha/\beta$  T cell receptor (TCR), CD3, and CD8 (grey histograms; BD Biosciences) or isotype control antibody (solid line). Percent positive cells are indicated in each histogram. (B) Western analysis using anti-human CD3-zeta mAb detects both endogenous CD3-zeta (16 kDa) and IL13-zetakine (52 kDa) or CD19R-zeta (67 kDa) CAR expression for engineered CTL lines. IL13-zeta CAR migrates as diffuse band consistent with glycosylation of human IL-13 (KS Kahlon et al, *Cancer Res* (2004) 64:9160-9166).

**A**

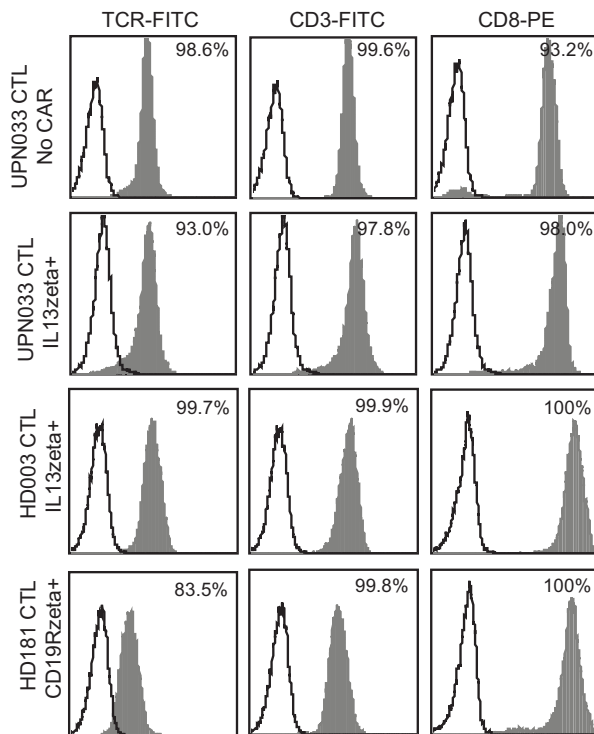

**B**

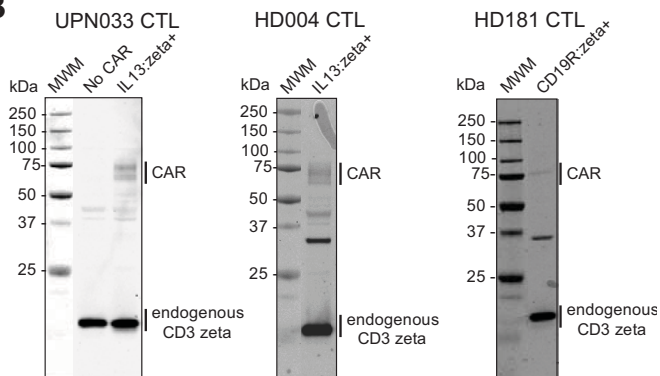

**Figure S3: IL13R $\alpha$ 2-specific CTLs kill IL13R $\alpha$ 2-expressing PBT017 brain tumor stem and differentiated cell populations.** (A) CRA measuring the lysis of IL13R $\alpha$ 2<sup>pos</sup> PBT017-4 TS and 7-day serum-differentiated (DIF), or serum-expanded (p7; ADH) cells at increasing effector:target ratios (x-axes). The IL13R $\alpha$ 2<sup>pos</sup> U251T established glioma line served as a positive control. The IL13R $\alpha$ 2<sup>neg</sup> CD19<sup>pos</sup> Daudi lymphoma served as a control target. Effector lines tested include the allogeneic CD8<sup>+</sup> IL13-zetakine<sup>+</sup> CTL clone 2D7 (HD003 IL13zeta<sup>+</sup> CTL) and the CD19-specific CD19R<sup>+</sup> CTL clone E8 (JD10 CD19R<sup>+</sup> CTL). (B) CRA measuring lysis of IL13R $\alpha$ 2<sup>pos</sup> PBT030 TS and 7-day serum-differentiated (DIF). The IL13R $\alpha$ 2<sup>pos</sup> U87 and LCL-OKT3 lines served as a positive controls. Effector lines tested are as described in (A). Mean  $\pm$  S.D. values of 6 wells are depicted.

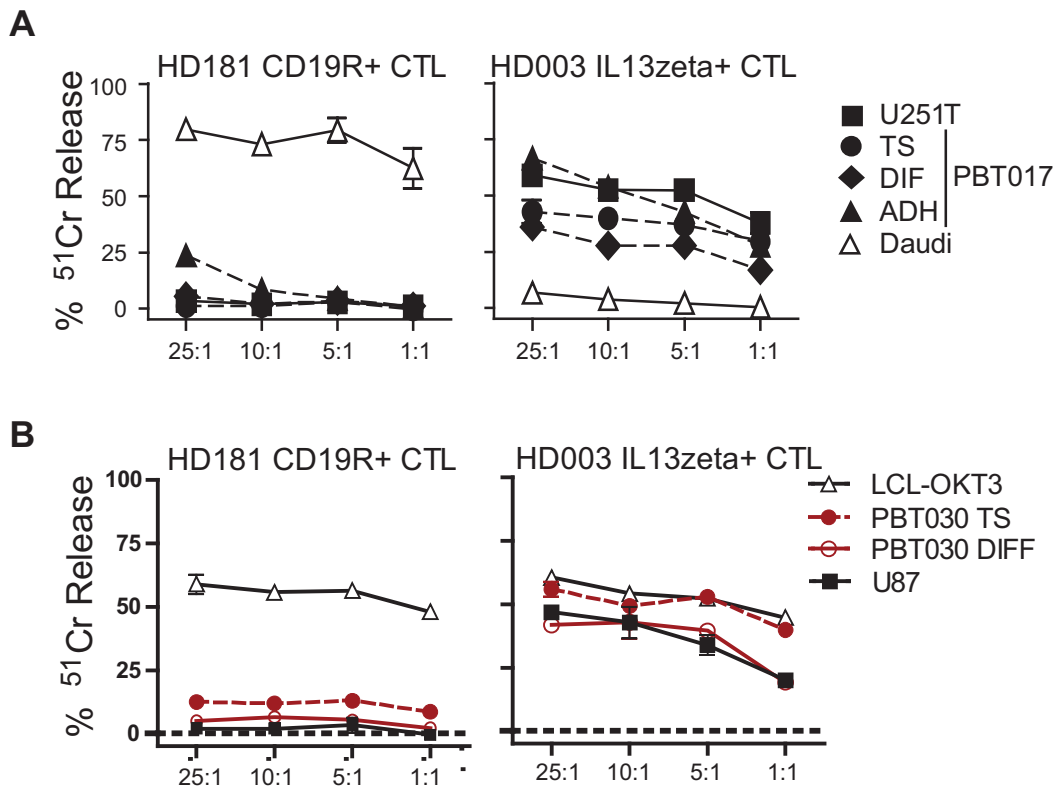

**Figure S4: INF- $\gamma$  and INF- $\alpha$  cytokine levels produced by IL13-zetakine<sup>+</sup> CTL following co-culture with IL13R $\alpha$ 2<sup>pos</sup> TS and DIF cells.** (A) Representative experiment showing IFN- $\gamma$  and TNF- $\alpha$  cytokine production by UPN033 IL13-zetakine<sup>+</sup> CD8<sup>+</sup> CTL clone 3C12 after overnight co-culture with IL13R $\alpha$ 2<sup>pos</sup> GSC lines (TS) and matched serum-differentiated lines (DIF; 7 days serum-differentiation). Mean  $\pm$  S.D. values of 3 replicate measurements from a single sample are depicted. Note that IL13-zetakine CTLs produced greater levels of cytokine when challenged with IL13R $\alpha$ 2<sup>pos</sup> serum differentiated glioma lines (DIF) as compared to matched GSC TS lines. (B) Fold difference (DIF/TS) in cytokine release by two independent IL13-zetakine<sup>+</sup> CTL clonal lines following co-culture with DIF and TS glioma lines. Each point represents an independent experiment. Line represents average fold increase in T cell cytokine production following engagement of DIF versus TS primary glioblastoma lines for all points (grand mean). Note that for the majority of experiments there was a 2-fold or greater increase in cytokine produced when targeting DIF versus matched TS targets (10 of 15 for INF- $\gamma$ , and 11 of 14 for TNF- $\alpha$ ). Upon comparison of all data sets, assuming all data points are independent, the difference between TS and DIF of PBT015 INF- $\gamma$  and TNF- $\alpha$  (pg/mL) levels was determined to be statistically significant ( $p < 0.05$ , Wilcoxon matched-pairs signed rank test); differences between that of TS and DIF of the other PBT lines approached but did not achieve significance.

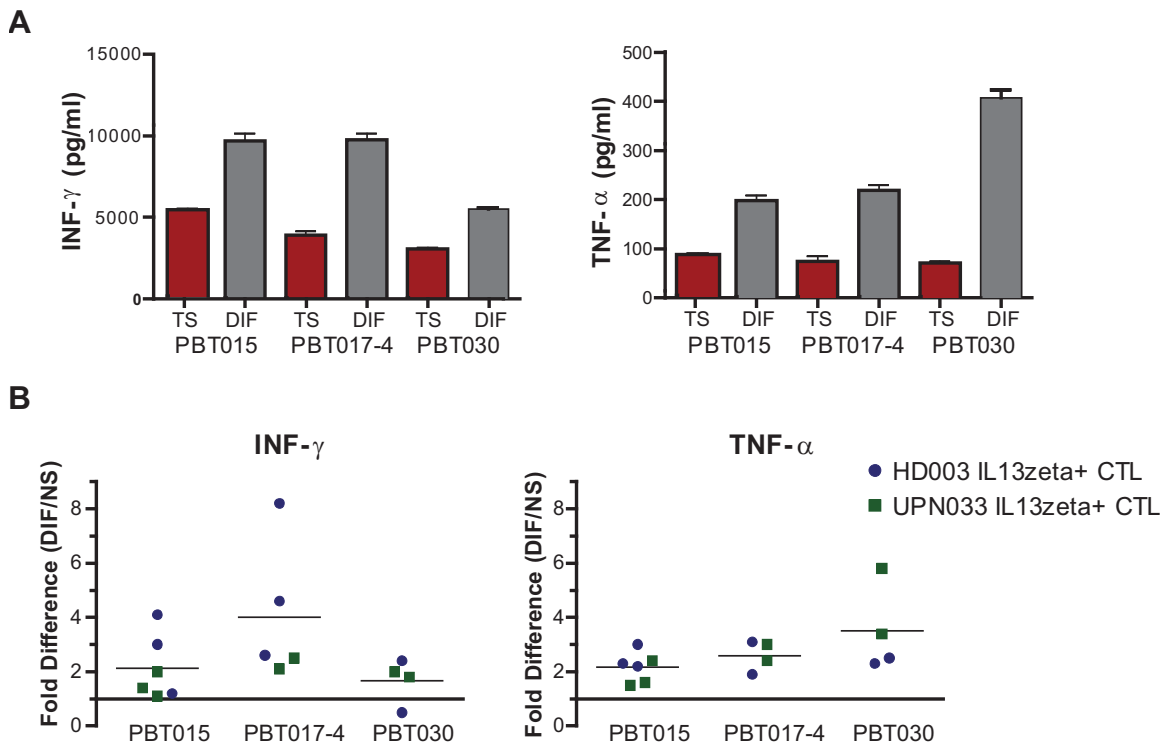



**Figure S5: Characterization of IL13R $\alpha$ 2 expression for PBT030-2.** (A) PBT030-2 tumor sphere (TS), and 7-day serum-differentiated (DIF) cells analyzed by flow cytometry for expression of IL13R $\alpha$ 2 (grey histograms); black histograms are secondary antibody alone. Percent positive cells are indicated in each histogram. PBT030-2 is glioma line derived from donor PBT030 that was heterotopically passaged in mice two-times prior to expansion *in vitro*. Similar to the parental PBT030 (**Fig. 2**), PBT030-2 expresses comparable levels of IL13R $\alpha$ 2 on both TS and DIF cells. (B) IHC staining for IL13R $\alpha$ 2 demonstrating that PBT030-2 TS initiates tumors that remain IL13R $\alpha$ 2<sup>pos</sup>. As a control we show that the IL13R $\alpha$ 2<sup>neg</sup> TS line, PBT003-4, initiates tumors that do not express this receptor.

**A**

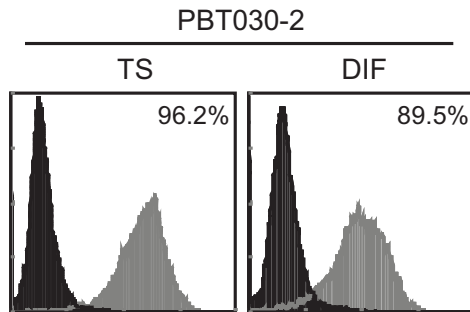

**B**

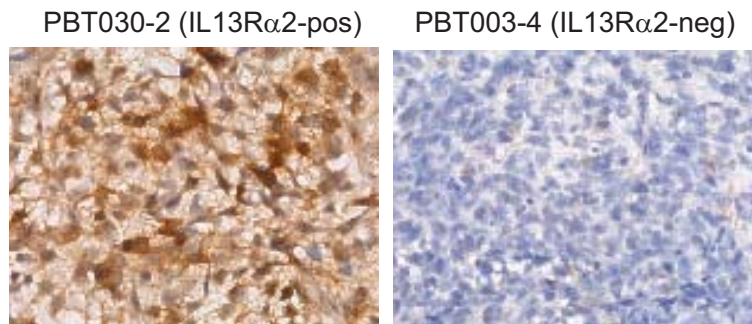

Supplement: NIHMS421560-supplement-7.pdf [file NIHMS421560-supplement-7.pdf]
